# Supplementary material
Source: Elsevier journal article supplement (https://www.sciencedirect.com/science/article/pii/S1885585721003819)
Supplement: mmc1 [file S1885585721003819:mmc1.pdf]

Rodríguez Leor O, et al. Análisis de la atención al infarto con elevación del segmento ST en España. Resultados del Registro de Código Infarto de la ACI-SEC

**Working Group on Infarct Code of the Spanish Interventional Cardiology Association Investigators.**

Personal key and participating study sites:

Manuel Villa, Hospital Universitario Virgen del Rocío; Rafael Ruiz-Salmerón, Hospital Universitario Virgen Macarena; Francisco Molano, Hospital Universitario Virgen de Valme; Carlos Sánchez, Hospital Universitario General de Málaga; Erika Muñoz-García, Hospital Universitario Virgen de la Victoria; Luis Iñigo, Hospital Costa del Sol; Juan Herrador, Hospital Universitario de Jaén; Antonio Gómez-Menchero, Hospital Universitario Juan Ramón Jiménez; Eduardo Molina, Hospital Universitario Virgen de las Nieves; Juan Caballero, Hospital Universitario San Cecilio; Soledad Ojeda, Hospital Universitario Reina Sofía; Mérida Cárdenas, Hospital Punta de Europa; Livia Gheorghe, Hospital Universitario Puerta del Mar; Jesús Oneto, Hospital Universitario de Jerez de la Frontera; Francisco Morales, Hospital Universitario de Puerto Real; Félix Valencia, Hospital Universitario Torrecárdenas; José Ramón Ruiz, Hospital Clínico Universitario Lozano Blesa; José Antonio Diarte, Hospital Universitario Miguel Servet; Pablo Avanzas, Hospital Universitario Central de Asturias; Juan Rondán, Hospital Universitario de Cabueñes; Vicente Peral, Hospital Universitari Son Espases; Lucía Vera Pernasetti, Policlínica Nuestra Señora del Rosario; Julio Hernández, Hospital Universitario Nuestra Señora de Candelaria; Francisco Bosa, Hospital Universitario de Canarias; Pedro Luis Martín Lorenzo, Hospital Universitario de Gran Canaria Doctor Negrín; Francisco Jiménez, Hospital Insular de Gran Canaria; José M. de la Torre Hernández, Hospital Universitario Marqués de Valdecilla de Santander; Jesús Jiménez-Mazuecos, Hospital General Universitario de Albacete; Fernando Lozano, Hospital General Universitario de Ciudad Real; José Moreu, Complejo Hospitalario de Toledo; Enrique Novo, Hospital Universitario de Guadalajara; Javier Robles, Hospital Universitario de Burgos; Javier Martín Moreiras, Hospital Universitario de Salamanca; Felipe Fernández-Vázquez, Hospital de León; Ignacio J. Amat-Santos, CIBERCV Hospital Clínico Universitario de Valladolid; Joan Antoni Gómez-Hospital, Hospital Universitari de Bellvitge; Joan García-Picart, Hospital de la Santa Creu i Sant Pau; Bruno García del Blanco, Hospital

Rodríguez Leor O, et al. Análisis de la atención al infarto con elevación del segmento ST en España. Resultados del Registro de Código Infarto de la ACI-SEC

Universitari Vall d'Hebron; Ander Regueiro, Hospital Clínic de Barcelona; Xavier Carrillo-Suarez, Hospital Universitari Germans Trias i Pujol; Helena Tizón, Hospital del Mar; Mohsen Mohandes, Hospital Universitari Joan XXIII; Juan Casanova, Hospital Universitari Arnau de Vilanova; Víctor Agudelo-Montañez, Hospital Universitari de Girona Josep Trueta; Juan Francisco Muñoz, Hospital Universitari Mútua de Tarrassa; Juan Franco, Hospital Universitario Fundación Jiménez Díaz; Roberto del Castillo, Hospital Universitario Fundación Alcorcón; Pablo Salinas, Hospital Clínico San Carlos y Hospital Príncipe de Asturias; Jaime Elízaga, Hospital General Universitario Gregorio Marañón; Fernando Sarnago, Hospital Universitario 12 de Octubre; Santiago Jiménez-Valero, Hospital Universitario La Paz; Fernando Rivero, Hospital Universitario de La Princesa; Juan Francisco Oteo, Hospital Universitario Puerta de Hierro Majadahonda; Eduardo Alegría-Barrero, Hospital Universitario de Torrejón-Universidad Francisco de Vitoria; Ángel Sánchez-Recalde, Hospital Ramón y Cajal; Valeriano Ruiz, Complejo Hospitalario de Navarra; Eduardo Pinar, Hospital Virgen de la Arrixaca; Luciano Consuegra-Sánchez, Hospital Universitario Santa Lucía de Cartagena; Ana Planas, Hospital General Universitario de Castellón; Bernabé López Ledesma, Hospital Universitario y Politécnico La Fe; Alberto Berenguer, Hospital General Universitario de Valencia; Agustín Fernández-Cisnal, Hospital Clínico Universitario de Valencia; Pablo Aguar, Hospital Universitario Dr. Peset; Francisco Pomar, Hospital Universitario de la Ribera; Miguel Jerez, Hospital de Manises; Francisco Torres, Hospitales de Torrevieja-Elche-Vinalopó; Ricardo García, Hospital General Universitario de Elche; Araceli Frutos, Hospital General Universitario de San Juan de Alicante; Juan Miguel Ruiz Nodar, Hospital General Universitario de Alicante; Koldobika García, Hospital Universitario de Cruces; Roberto Sáez, Hospital de Basurto; Alfonso Torres, Hospital Universitario Araba; Miren Tellería, Hospital Universitario Donostia; Mario Sadaba, Hospital de Galdakao-Usansolo; José Ramón López Mínguez, Complejo Hospitalario Universitario de Badajoz; Juan Carlos Rama Merchán, Hospital de Mérida; Javier Portales, Complejo Hospitalario Universitario de Cáceres; Ramiro Trillo, Hospital Clínico Universitario Santiago

Rodríguez Leor O, et al. Análisis de la atención al infarto con elevación del segmento  
ST en España. Resultados del Registro de Código Infarto de la ACI-SEC

de Compostela; Guillermo Aldama, Complejo Hospitalario Universitario de A Coruña; Saleta Fernández,  
Complejo Hospitalario Universitario de Vigo; Melisa Santás, Hospital Universitario Lucus Augusti; María  
Pilar Portero Pérez, Hospital San Pedro de Logroño.

Rodríguez Leor O, et al. Análisis de la atención al infarto con elevación del segmento ST en España. Resultados del Registro de Código Infarto de la ACI-SEC

## ANEXO 1. VARIABLES DEL REGISTRO

|                                                                                                                         |
|-------------------------------------------------------------------------------------------------------------------------|
| <b>1. Datos de identificación</b>                                                                                       |
| <i>Fecha de nacimiento</i>                                                                                              |
| <i>Sexo</i>                                                                                                             |
| <i>Hospital donde se realiza el procedimiento intervencionista (se asignará un número identificativo a cada centro)</i> |
| <b>2. Antecedentes</b>                                                                                                  |
| <i>HTA</i>                                                                                                              |
| <i>Diabetes mellitus</i>                                                                                                |
| <i>Dislipemia</i>                                                                                                       |
| <i>Tabaquismo activo</i>                                                                                                |
| <i>AVC/AIT</i>                                                                                                          |
| <i>Infarto previo</i>                                                                                                   |
| <i>Angioplastia previa</i>                                                                                              |
| <i>Cirugía de revascularización coronaria previa</i>                                                                    |
| <i>Tratamiento previo al evento actual (antes de tener el infarto actual):</i>                                          |
| <i>AAS</i>                                                                                                              |
| <i>Clopidogrel/ticagrelor/prasugrel</i>                                                                                 |
| <i>Anticoagulantes: acenocumarol/ACOD</i>                                                                               |
| <b>3. Datos de entrada al sistema sanitario</b>                                                                         |
| <i>Fecha y hora del inicio del dolor</i>                                                                                |
| <i>Lugar de primera asistencia sanitaria:</i>                                                                           |
| <i>Servicio de emergencias (domicilio o vía pública)</i>                                                                |
| <i>Centro de salud</i>                                                                                                  |
| <i>Hospital sin hemodinámica (no tiene hemodinámica o la tiene pero no participa en Código Infarto)</i>                 |
| <i>Hospital con hemodinámica</i>                                                                                        |
| <i>No disponible</i>                                                                                                    |
| <i>Fecha y hora de primera asistencia sanitaria</i>                                                                     |

Rodríguez Leor O, et al. Análisis de la atención al infarto con elevación del segmento ST en España. Resultados del Registro de Código Infarto de la ACI-SEC

|                                                                                             |
|---------------------------------------------------------------------------------------------|
| <i>Fecha y hora de realización del primer electrocardiograma</i>                            |
| <i>Valoración del primer electrocardiograma:</i>                                            |
| Elevación del segmento ST                                                                   |
| BRIHH                                                                                       |
| BRDHH                                                                                       |
| Sin elevación del segmento ST                                                               |
| Sospecha de infarto posterior                                                               |
| Otros                                                                                       |
| <i>Fecha y hora del diagnóstico de IAMCEST</i>                                              |
| <i>Decisión terapéutica en la primera asistencia:</i>                                       |
| Fibrinólisis                                                                                |
| Angioplastia primaria                                                                       |
| Traslado a hospital con ICP para la decisión (duda diagnóstica)                             |
| Traslado a hospital sin ICP para la decisión (duda diagnóstica)                             |
| Información no disponible                                                                   |
| <i>Fecha y hora de activación del Código Infarto o la decisión terapéutica</i>              |
| <i>Tratamiento farmacológico en la primera asistencia:</i>                                  |
| AAS                                                                                         |
| Clopidogrel/ticagrelor/prasugrel                                                            |
| HBPM/HNF/bivalirudina                                                                       |
| <i>Trombolisis, sí/no</i>                                                                   |
| <i>Complicaciones en la primera asistencia (antes de llegar a la sala de hemodinámica):</i> |
| FV                                                                                          |
| TV                                                                                          |
| BAV                                                                                         |
| Edema agudo de pulmón                                                                       |
| <i>Shock cardiogénico</i>                                                                   |
| Hemorragia                                                                                  |

Rodríguez Leor O, et al. Análisis de la atención al infarto con elevación del segmento ST en España. Resultados del Registro de Código Infarto de la ACI-SEC

|                                                                                                                               |
|-------------------------------------------------------------------------------------------------------------------------------|
| Intubación orotraqueal                                                                                                        |
| Desfibrilación/cardioversión                                                                                                  |
| Asistolia                                                                                                                     |
| Muerte                                                                                                                        |
| <i>En caso de muerte en la primera asistencia, se registra fecha y hora</i>                                                   |
| <i>Medio de transporte al hospital con angioplastia primaria:</i>                                                             |
| Medios propios                                                                                                                |
| Servicio de emergencias (112/061)                                                                                             |
| Otros                                                                                                                         |
| <b>4. Datos de llegada al hospital con angioplastia primaria</b>                                                              |
| <i>Unidad o servicio que recibe al paciente:</i>                                                                              |
| Urgencias                                                                                                                     |
| Hemodinámica                                                                                                                  |
| Unidad de cuidados intensivos                                                                                                 |
| Unidad coronaria                                                                                                              |
| Paciente ya hospitalizado en el centro                                                                                        |
| Otros                                                                                                                         |
| <i>Fecha y hora de llegada al hospital con angioplastia primaria</i>                                                          |
| <i>El hospital confirma la alerta: sí/no (realmente está indicada la activación del Código Infarto)</i>                       |
| <i>Diagnostico en el hospital con angioplastia primaria (en la primera valoración al llegar al centro de Código Infarto):</i> |
| IAMCEST                                                                                                                       |
| IAMSEST                                                                                                                       |
| SCA no clasificable                                                                                                           |
| No es un SCA                                                                                                                  |
| <i>Clase Killip a la llegada (I-IV)</i>                                                                                       |
| <b>5. Datos del procedimiento intervencionista</b>                                                                            |
| <i>Tipo de angioplastia:</i>                                                                                                  |

Rodríguez Leor O, et al. Análisis de la atención al infarto con elevación del segmento ST en España. Resultados del Registro de Código Infarto de la ACI-SEC

|                                                                              |
|------------------------------------------------------------------------------|
| Angioplastia primaria                                                        |
| Angioplastia de rescate                                                      |
| Tras una fibrinólisis efectiva                                               |
| Coronariografía sin ACTP                                                     |
| <i>Tratamiento periprocedimiento (si no se ha administrado previamente):</i> |
| AAS                                                                          |
| Clopidogrel/ticagrelor/prasugrel                                             |
| HBPM/HNF/bivalirudina                                                        |
| Anti-GPIIb/IIIa                                                              |
| <i>Fecha y hora de llegada a la sala de hemodinámica</i>                     |
| <i>Fecha y hora del inicio del procedimiento</i>                             |
| <i>Vía de acceso: radial/femoral</i>                                         |
| <i>Vasos enfermos:</i>                                                       |
| TCI                                                                          |
| DA                                                                           |
| CX                                                                           |
| CD                                                                           |
| Injerto                                                                      |
| <i>Arteria culpable del infarto:</i>                                         |
| TCI                                                                          |
| DA                                                                           |
| CX                                                                           |
| CD                                                                           |
| Injerto                                                                      |
| <i>Causa de que no se intervenga:</i>                                        |
| Coronarias sin lesiones significativas                                       |
| Dificultad técnica                                                           |
| Malos lechos                                                                 |
| Derivado a cirugía                                                           |

Rodríguez Leor O, et al. Análisis de la atención al infarto con elevación del segmento ST en España. Resultados del Registro de Código Infarto de la ACI-SEC

|                                                                                                  |
|--------------------------------------------------------------------------------------------------|
| Muerte previa                                                                                    |
| Otros                                                                                            |
| <i>Intervención sobre la arteria culpable del infarto:</i>                                       |
| Trombectomía                                                                                     |
| Balón                                                                                            |
| <i>Stents metálicos y su número</i>                                                              |
| <i>Stents farmacoactivos y su número</i>                                                         |
| <i>Fecha y hora del paso de dispositivo</i>                                                      |
| <i>TIMI basal</i>                                                                                |
| <i>TIMI final</i>                                                                                |
| <i>Fecha y hora de la apertura de la arteria culpable del infarto</i>                            |
| <i>Intervención sobre vaso no culpable: sí/no</i>                                                |
| <i>Arteria no culpable tratada en el procedimiento índice:</i>                                   |
| TCI                                                                                              |
| DA                                                                                               |
| CX                                                                                               |
| CD                                                                                               |
| Injerto                                                                                          |
| <i>Complicaciones durante el procedimiento (durante la estancia en la sala de hemodinámica):</i> |
| FV                                                                                               |
| TV                                                                                               |
| BAV                                                                                              |
| Edema agudo de pulmón                                                                            |
| <i>Shock cardiogénico</i>                                                                        |
| Hemorragia                                                                                       |
| Intubación orotraqueal                                                                           |
| Desfibrilación/cardioversión                                                                     |
| Asistolia                                                                                        |

Rodríguez Leor O, et al. Análisis de la atención al infarto con elevación del segmento ST en España. Resultados del Registro de Código Infarto de la ACI-SEC

|                                                                                                                                                                                        |
|----------------------------------------------------------------------------------------------------------------------------------------------------------------------------------------|
| Muerte                                                                                                                                                                                 |
| <i>Necesidad de asistencia hemodinámica durante el procedimiento:</i>                                                                                                                  |
| BCIAo                                                                                                                                                                                  |
| Impella                                                                                                                                                                                |
| ECMO                                                                                                                                                                                   |
| Otros                                                                                                                                                                                  |
| <i>En caso de muerte en el procedimiento, fecha y hora</i>                                                                                                                             |
| <i>Hora de finalización del procedimiento</i>                                                                                                                                          |
| <i>En caso de que se detecte un retraso no justificado entre la primera asistencia sanitaria y la reperusión, este se ha debido a:</i>                                                 |
| No se detecta retraso no justificado                                                                                                                                                   |
| Retraso o error en el diagnóstico inicial (tiempo hasta la activación del código > 30 min)                                                                                             |
| Tiempo de transporte prolongado por la distancia entre el primer hospital y el centro con hemodinámica (tiempo de transporte > 90 min)                                                 |
| Tiempo de transporte prolongado por problema de disponibilidad del sistema de emergencias médicas (tiempo entre la activación del código y la salida del hospital sin código > 30 min) |
| Problema de disponibilidad de la sala de hemodinámica (sala ocupada en el momento de llegada del paciente al hospital de Código Infarto)                                               |
| Cambio en el estado clínico del paciente (PCR que requiere maniobras de reanimación, <i>shock</i> cardiogénico que requiere asistencia hemodinámica, etc.)                             |
| Dificultad técnica durante la ICP (dificultad en la punción, dificultad en el cruce de la guía, etc.)                                                                                  |
| Otros                                                                                                                                                                                  |
| <b>6. Datos tras el procedimiento</b>                                                                                                                                                  |
| <i>Complicaciones durante el ingreso hospitalario (a partir de la salida de la sala de hemodinámica):</i>                                                                              |
| FV                                                                                                                                                                                     |

Rodríguez Leor O, et al. Análisis de la atención al infarto con elevación del segmento ST en España. Resultados del Registro de Código Infarto de la ACI-SEC

|                                                                    |
|--------------------------------------------------------------------|
| TV                                                                 |
| BAV                                                                |
| Edema agudo de pulmón                                              |
| <i>Shock</i> cardiogénico                                          |
| Hemorragia                                                         |
| Intubación orotraqueal                                             |
| Desfibrilación/cardioversión                                       |
| Asistolia                                                          |
| Complicación mecánica                                              |
| Trombosis aguda del <i>stent</i> (primeras 24 h)                   |
| Reinfarto (primeras 24 h)                                          |
| Muerte                                                             |
| <i>En caso de muerte hospitalaria, fecha y hora</i>                |
| <i>Diagnóstico final:</i>                                          |
| IAMCEST (anterior, inferior, lateral, posterior)                   |
| IAMSEST                                                            |
| Angina inestable                                                   |
| Miopericarditis                                                    |
| Disfunción apical transitoria                                      |
| TEP                                                                |
| Disección aórtica                                                  |
| Sin diagnóstico                                                    |
| Otro                                                               |
| <i>Fecha y hora de alta del hospital con angioplastia primaria</i> |
| <i>Destino de alta:</i>                                            |
| Domicilio                                                          |
| Otro hospital (centro de referencia u otros centros)               |
| <i>Estado a 1 mes del IAMCEST</i>                                  |
| Fallecido                                                          |

Rodríguez Leor O, et al. Análisis de la atención al infarto con elevación del segmento  
ST en España. Resultados del Registro de Código Infarto de la ACI-SEC

|                                        |
|----------------------------------------|
| Vivo                                   |
| Desconocido                            |
| <i>Observaciones clínicas del caso</i> |
